# Supplementary material for: De NovoAssembly and Comparative Transcriptome Analysis Provide Insight into Lysine Biosynthesis inToona sinensisRoem
Source: Hindawi journal article supplement (doi:10.1155/2016/6735209), 2016-01-01
Supplement: f1 [file 6735209.f1.pdf]

## Additional file

**Table S1 Assessment of assembly quality for two *T. sinensis* libraries**

| Sample   | Raw Reads | Clean Reads | Clean Bases | Error(%) | Q20(%) | Q30(%) | GC Content(%) |
|----------|-----------|-------------|-------------|----------|--------|--------|---------------|
| XC_L_4_1 | 22841245  | 21306359    | 2.13G       | 0.04     | 96.92  | 90.41  | 45.09         |
| XC_L_4_2 | 22841245  | 21306359    | 2.13G       | 0.03     | 97.47  | 91.99  | 45.09         |
| XC_L_6_1 | 30874262  | 29687215    | 2.97G       | 0.03     | 97.23  | 91.35  | 43.44         |
| XC_L_6_2 | 30874262  | 29687215    | 2.97G       | 0.03     | 97.62  | 92.55  | 43.46         |

**Table S2. RPKM values and comparison of DEGs in Lysine biosynthesis pathway under the condition of XC\_L\_4 vs XC\_L\_6**

| Gene ID      | RPKM value (XC_L_4) | RPKM value (XC_L_6) | Log <sub>2</sub> <sup>-Fold change</sup> | KO Name                                                             |
|--------------|---------------------|---------------------|------------------------------------------|---------------------------------------------------------------------|
| comp45867_c0 | 42.6664             | 6.6216              | 2.6879                                   | Aspartate kinase (LysC) [EC:2.7.2.4]                                |
| comp47995_c0 | 50.9807             | 14.3693             | 1.827                                    | Homoserine dehydrogenase [EC:1.1.1.3]                               |
| comp43865_c0 | 50.5255             | 7.4672              | 2.7584                                   | Aspartate-semialdehyde dehydrogenase (Asd)[EC:1.2.1.11]             |
| comp45016_c0 | 98.7750             | 35.3986             | 1.4805                                   | 4-hydroxy-tetrahydrodipicolinate synthase (DapA) [EC:4.3.3.7]       |
| comp41544_c0 | 108.9146            | 40.1190             | 1.4408                                   | 4-hydroxy-tetrahydrodipicolinate reductase (DapB) [EC:1.17.1.8]     |
| comp43351_c0 | 84.9979             | 23.3191             | 1.8659                                   | LL-diaminopimelate aminotransferase (ll-DAP-AT/DapL), [EC:2.6.1.83] |
| comp45712_c0 | 74.5592             | 20.7871             | 1.8427                                   | Diaminopimelate decarboxylase(LysA) [EC:4.1.1.20]                   |

**Table S3. Comparative N50 and average length with other plant species recently published in transcriptome data**

| Species                      | N50 (bp) | Average length (bp) | Reference                                     |
|------------------------------|----------|---------------------|-----------------------------------------------|
| <i>Toona sinensis</i>        | 1,304    | 764                 | In the paper                                  |
| <i>Reaumuria soongorica</i>  | 1,109    | 677                 | Shi et al., 2013 <sup>[23]</sup>              |
| <i>Haloxylon ammodendron</i> | 1,345    | 728                 | Long et al., 2014 <sup>[22]</sup>             |
| <i>Salvia splendens</i>      | 1,304    | 772                 | Ge et al., 2014 <sup>[33]</sup>               |
| <i>Physalis peruviana</i>    | 1,438    | 743                 | Garz ún-Mart ínez et al, 2012 <sup>[20]</sup> |
| <i>Quercus pubescens</i>     | 910      | 618                 | Torre et al., 2014 <sup>[21]</sup>            |
